# Supplementary material for: Polyamine-containing natural products: structure, bioactivity, and biosynthesis
Source: Royal Society of Chemistry journal article supplement (doi:10.1039/d2np00087c), 2023-10-24
Supplement: d2np00087c1.pdf [file d2np00087c1.pdf]

## Supplemental Material

### Polyamine-containing natural products: structure, bioactivity, and biosynthesis

*Qingshan Long,<sup>a</sup> Wen Zhou,<sup>b</sup> Haibo Zhou,<sup>c</sup> Ying Tang,<sup>a</sup> Wu Chen,<sup>\*d</sup> Qingshu Liu,<sup>\*a</sup>  
Xiaoying Bian<sup>\*c</sup>*

<sup>a</sup> Hunan Provincial Engineering and Technology Research Center for Agricultural Microbiology Application, Hunan Institute of Microbiology, Changsha, 410009 China

<sup>b</sup> Key Laboratory of Veterinary Chemical Drugs and Pharmaceutics, Ministry of Agriculture and Rural Affairs, Shanghai Veterinary Research Institute, Chinese Academy of Agricultural Sciences, Shanghai 200241, China

<sup>c</sup> Helmholtz International Lab for Anti-Infectives, Shandong University-Helmholtz Institute of Biotechnology, State Key Laboratory of Microbial Technology, Shandong University, Qingdao, 266237 China

<sup>d</sup> College of Plant Protection, Hunan Agricultural University, Changsha, 410128 China

#### *Correspondence:*

\* Prof. Xiaoying Bian, [bianxiaoying@sdu.edu.cn](mailto:bianxiaoying@sdu.edu.cn)

\* Prof. Qingshu Liu, [liuqingshu@hnwyy.cn](mailto:liuqingshu@hnwyy.cn)

\* Prof. Wu Chen, [wuchen77@hunau.edu.cn](mailto:wuchen77@hunau.edu.cn)

## Content

|                                                                                                                               |    |
|-------------------------------------------------------------------------------------------------------------------------------|----|
| Tab. S1 The sources and bioactivities of polyamine-containing natural products .....                                          | 3  |
| Tab. S2 Proteins predicted to be involved in the attachment of the polyamine moiety to the scaffolds .....                    | 9  |
| Fig. S1 Structures of two semi-synthetic compounds F14512 and etoposide and their natural precursor (-)-podophyllotoxin ..... | 11 |
| Fig. S2 Source composition of polyamine alkaloids (A) and polyamine siderophores (B) .....                                    | 12 |
| Fig. S3 Structures of meehanines A-W ( <b>112-134</b> ) .....                                                                 | 13 |
| References .....                                                                                                              | 14 |

**Tab. S1** The sources and bioactivities of polyamine-containing natural products

| Compounds                                                 | No.      | Organisms                                                                                                                | Bioactivities                                                                  | Ref.   |
|-----------------------------------------------------------|----------|--------------------------------------------------------------------------------------------------------------------------|--------------------------------------------------------------------------------|--------|
| <b>Plants</b>                                             |          |                                                                                                                          |                                                                                |        |
| Scotanamines A-D                                          | 14-17    | <i>Scopolia tangutica</i>                                                                                                | $\mu$ -opioid receptor agonist                                                 | 1      |
| Trihydroxycinnamoyl spermidines                           | 18-22    | Eudicotyledons (Rosaceae, Asteraceae, Liliaceae, Solanaceae, Fabaceae, Pandaceae, etc.)                                  | Antibacterial (G <sup>+</sup> ), antiviral, anti-depression, and antioxidative | 2-6    |
| Dovyalins A-F and H-I                                     | 29-36    | Salicaceae ( <i>Dovyalis macrocalyx</i> , <i>D. abyssinica</i> , <i>D. hebecarpa</i> , <i>Homalium cochinchinensis</i> ) | Cytotoxicity                                                                   | 7-9    |
| Lycibarbarspermidines A-O, and T                          | 82-97    | <i>Lycium barbarum</i>                                                                                                   | Anti-AD (Alzheimer's disease), antioxidative, anti-inflammatory                | 10, 11 |
| Lyciamarspermidines A-C                                   | 98-100   | <i>Lycium</i> sp.                                                                                                        | Anti-inflammatory                                                              | 12     |
| Lyciamarspermines A and B                                 | 101, 102 | <i>Lycium</i> sp.                                                                                                        | -                                                                              | 12     |
| Capparis spine, capparis spine 26-O- $\beta$ -D-glucoside | 103, 104 | <i>Capparis spinosa</i>                                                                                                  | -                                                                              | 13     |
| Cadabacine                                                | 105      | <i>Cadaba farinosa</i>                                                                                                   | Antiparasitic                                                                  | 14, 15 |
| Cadabacine 26-O- $\beta$ -D-glucoside                     | 106      | <i>Capparis spinosa</i>                                                                                                  | -                                                                              | 13     |
| Dracotanosides A-D                                        | 107-110  | <i>Dracocephalum tanguticum</i>                                                                                          | -                                                                              | 16     |
| Hyssopuszine                                              | 111      | <i>Hyssopus cuspidatus</i>                                                                                               | Antifungal                                                                     | 17     |
| Meehanines A-W                                            | 112-134  | <i>Meehania urticifolia</i>                                                                                              | -                                                                              | 18, 19 |
| ( $\pm$ )-Orychovioline A and B                           | 135-138  | <i>Orychophragmus violaceus</i>                                                                                          | Radioprotective activity                                                       | 20     |
| Lunarine, lunaridine                                      | 139, 140 | <i>Lunaria biennis</i> , L. <i>rediviva</i> , L. <i>annua</i>                                                            | Antitrypanosomal                                                               | 21     |
| Androderine, (+)-decaryine A, (-)-decaryine B             | 141-143  | <i>Androya decaryi</i>                                                                                                   | -                                                                              | 22     |
| Meefarnines A and B                                       | 144, 145 | <i>Meehania fargesii</i> , <i>Dendrobium officinale</i>                                                                  | Hyaluronidase inhibitory activity                                              | 23     |

|                                            |          |                                                                                                                               |                                                            |        |
|--------------------------------------------|----------|-------------------------------------------------------------------------------------------------------------------------------|------------------------------------------------------------|--------|
| Celacarfurine                              | 146      | <i>Tripterygium wilfordii</i>                                                                                                 | Anti-inflammation                                          | 24     |
| Gymnarine                                  | 147      | <i>Gymnosporia arenicola</i>                                                                                                  | -                                                          | 25     |
| <b>Bacteria</b>                            |          |                                                                                                                               |                                                            |        |
| Phevamine A                                | 26       | <i>Pseudomonas syringae</i>                                                                                                   | Suppress plant immune responses                            | 26     |
| JBIR-94, JBIR-125                          | 27, 28   | <i>Streptomyces</i> sp.                                                                                                       | Antioxidative, antibacterial (G <sup>-</sup> ), anticancer | 27     |
| Propanochelin, butanochelin, pentanochelin | 148-150  | <i>Acinetobacter bouvetii</i>                                                                                                 | Iron-chelating                                             | 28     |
| Lysochelin                                 | 151      | <i>Lysobacter enzymogenes</i>                                                                                                 | Iron-chelating                                             | 29     |
| Serratiochelins A-C                        | 152-154  | <i>Serratia marcescens</i>                                                                                                    | Iron-chelating, antitumor, antibacterial (G <sup>+</sup> ) | 30, 31 |
| Petrobactin                                | 156      | <i>Marinobacter hydrocarbonoclasticus</i> ,<br><i>Bacillus anthracis</i> , <i>B. cereus</i> ,<br><i>Alteromonas macleodii</i> | Iron-chelating                                             | 32-34  |
| Fimsbactins A-D and F                      | 157-161  | <i>Acinetobacter baumannii</i> ,<br><i>Acinetobacter baylyi</i>                                                               | Iron-chelating                                             | 35     |
| Photobactin                                | 162      | <i>Photorhabdus luminescens</i>                                                                                               | Iron-chelating, antibiosis                                 | 36     |
| Vibriobactin                               | 163      | <i>Vibrio cholerae</i>                                                                                                        | Iron-chelating                                             | 37     |
| Vulnibactin and related molecule           | 164, 165 | <i>Vibrio vulnificus</i>                                                                                                      | Iron-chelating                                             | 38     |
| Fluviobactin                               | 166      | <i>Vibrio fluvialis</i>                                                                                                       | Iron-chelating                                             | 39     |
| Nigribactin                                | 167      | <i>Vibrio nigripulchritudo</i>                                                                                                | Iron-chelating                                             | 40     |
| Agrobactin                                 | 168      | <i>Agrobacterium tumefaciens</i> ,<br><i>Paracoccus denitrificans</i>                                                         | Iron-chelating                                             | 41, 42 |
| Parabactin                                 | 169      | <i>Paracoccus denitrificans</i>                                                                                               | Iron-chelating                                             | 42     |
| Labrenzbactin                              | 170      | <i>Labrenzia</i> sp.                                                                                                          | Iron-chelating                                             | 43     |
| Putrebactin                                | 171      | <i>Shewanella putrefaciens</i>                                                                                                | Iron-chelating                                             | 44     |
| Avaroferrin                                | 172      | <i>Shewanella algae</i>                                                                                                       | Iron-chelating                                             | 45     |
| Bisucaberin                                | 173      | <i>Alteromonas haloplanktis</i> ,<br><i>Vibrio salmonicida</i>                                                                | Iron-chelating                                             | 46, 47 |
| Aculeolamides A and B                      | 174, 175 | <i>Streptomyces aculeolatus</i>                                                                                               | Iron-chelating, antitubercular, antimalarial               | 48     |
| Desferrioxamines B, E                      | 176-178  | <i>Streptomyces coelicolor</i> ,                                                                                              | Iron-chelating                                             | 49, 50 |

|                                                                                       |              |                                                                  |                                                                                                              |        |
|---------------------------------------------------------------------------------------|--------------|------------------------------------------------------------------|--------------------------------------------------------------------------------------------------------------|--------|
| and G <sub>1</sub>                                                                    |              | <i>Erwinia amylovora</i>                                         |                                                                                                              |        |
| Fulvivirgamides A <sub>2</sub> , B <sub>2</sub> , B <sub>3</sub> , and B <sub>4</sub> | 179-182      | <i>Fulvivirga</i> sp.                                            | Iron-chelating                                                                                               | 51     |
| Acinetoferriin                                                                        | 183          | <i>Acinetobacter haemolyticus</i>                                | Iron-chelating                                                                                               | 52     |
| Rhizobactin 1021                                                                      | 184          | <i>Rhizobium meliloti</i> 1021,<br><i>Sinorhizobium meliloti</i> | Iron-chelating                                                                                               | 53, 54 |
| Synechobactins A-C                                                                    | 185-187      | <i>Synechococcus</i> sp.                                         | Iron-chelating                                                                                               | 55     |
| Schizokinen                                                                           | 188          | <i>Bacillus megaterium</i> ,<br><i>Rhizobium leguminosarum</i>   | Iron-chelating                                                                                               | 56, 57 |
| Fradiamines A and B                                                                   | 189, 190     | <i>Streptomyces fradiae</i>                                      | Iron-chelating, antibacterial                                                                                | 58     |
| Malleobactins A-H                                                                     | 191-198      | <i>Burkholderia mallei</i> , <i>B. pseudomallei</i>              | Iron-chelating                                                                                               | 59, 60 |
| Crochelins A-D                                                                        | 199-202      | <i>Azotobacter chroococcum</i>                                   | Iron-chelating                                                                                               | 61     |
| Ornibactins C <sub>4</sub> , C <sub>6</sub> , and C <sub>8</sub>                      | 203-205      | <i>Pseudomonas cepacia</i> ,<br><i>Burkholderia cenocepacia</i>  | Iron-chelating                                                                                               | 62, 63 |
| Ferrisiderophore                                                                      | 206          | <i>Burkholderia xenovorans</i>                                   | Iron-chelating                                                                                               | 64     |
| Caribactins A-F                                                                       | 207-212      | <i>Paraburkholderia caribensis</i>                               | Iron-chelating                                                                                               | 65     |
| Glidonins A-L                                                                         | 213-224      | <i>Schlegelella brevitalea</i>                                   | Cytotoxicity, antitumor                                                                                      | 66     |
| Edeines A, B, D, and F                                                                | 225-228      | <i>Brevibacillus brevis</i>                                      | Antibacterial (both G <sup>+</sup> and G <sup>-</sup> ), antifungal, antitumor, immunosuppressive activities | 67, 68 |
| Paenilamicins A <sub>1</sub> , A <sub>2</sub> , B <sub>1</sub> , and B <sub>2</sub>   | 229-232      | <i>Paenibacillus larvae</i>                                      | Antibacterial (G <sup>+</sup> ), antifungal                                                                  | 69     |
| Galantin I                                                                            | 233          | <i>Paenibacillus pulvifaciens</i>                                | Antibacterial (both G <sup>+</sup> and G <sup>-</sup> )                                                      | 70     |
| Pingyangmycin                                                                         | 234          | <i>Streptomyces pingyangensis</i>                                | Anticancer                                                                                                   | 71     |
| Boanmycin                                                                             | 235          | <i>Streptomyces pingyangensis</i>                                | Anticancer                                                                                                   | 72     |
| Boningmycin                                                                           | 236          | <i>Streptomyces verticillus</i> var. <i>pingyangensis</i> n.sp.  | Anticancer                                                                                                   | 73     |
| Zeamine, zeamine I, and zeamine II                                                    | 247, 248, 10 | <i>Dickeya zeae</i> , <i>Serratia plymuthica</i>                 | Antibacterial (both G <sup>+</sup> and G <sup>-</sup> ), antifungal, nematicidal                             | 74-76  |
| Fabclavines Ia, Ib, IIa, IIb, IIIc, IIIId, IVa, and IVb                               | 249-256      | <i>Xenorhabdus szentirmaii</i> , <i>X. budapestensis</i>         | Antibacterial (both G <sup>+</sup> and G <sup>-</sup> ), antifungal, antiprotozoan and nematicidal           | 77, 78 |

Truncated fabclavine derivatives 257-260 *Xenorhabdus szentirmaii* Antibacterial (both G<sup>+</sup> and G<sup>-</sup>), antifungal 79

**Fungi**

Flavunoidine 60 *Aspergillus flavus* - 80  
 Pistillarín 155 Basidiomycetes Iron-chelating, antioxidative 81-83  
 (*Clavariadelphus pistillaris*,  
*Ramaria* sp., *Gomphus floccosus*), *Penicillium bilaii*

**Marine sponges**

Normonachocidins A, B, D, G, and H 37-41 *Monanchora pulchra* Anticancer 84, 85  
 Monanchomycalins A-C 42-44 *Monanchora pulchra* Anticancer 86, 87  
 Ptilomycalin A 45 *Ptilocaulis spiculifef*, *Monanchora pulchra* Anticancer 87, 88  
 Monanchoxymycalins A and B 46, 47 *Monanchora pulchra* Anticancer 89  
 Halitulín 48 *Haliclona tulearensis* Antitumor 90  
 Isohalitulín 49 *Haliclona tulearensis* Toxicity 91  
 Haliclorensín 50 *Haliclona tulearensis* - 92  
 Haliclorensín B 52 *Haliclona tulearensis* Toxicity 91  
 Haliclorensín D 53 *Neopetrosia chaliniformis* - 93  
 Neopetrocyclamines A and B 54, 55 *Neopetrosia cf exigua* - 94  
 Papuamine, haliclonadiamines 56, 57-59 *Haliclona* sp., *Halichondria panicea*, *Neopetrosia cf exigua* Antibacterial (G<sup>+</sup>), antifungal, anticancer 94-98  
 Ianthelliformisamines A-C 61-63 *Suberea ianthelliformis* Antibacterial (both G<sup>-</sup> and G<sup>+</sup>) 99  
 Tokaradine C 64 *Pseudoceratina purpurea* Insecticidal 100  
 Spermatinamine 65 *Pseudoceratina* sp. Antibacterial (G<sup>-</sup>), isoprenylcysteine carboxyl methyltransferase (Icmt) inhibitor 101  
 Pseudoceramines A-D 66-69 *Pseudoceratina* sp. Antibacterial (G<sup>-</sup>) 102  
 Pseudoceratidíne 70 *Pseudoceratina purpurea* Antifouling, antibacterial (both G<sup>+</sup> and G<sup>-</sup>), antifungal 103, 104  
 Pseudoceratidíne derivatives 71-75 *Tedania brasiliensis* Antiparasitic 105

|                                |         |                                                                                                                                                                            |                                                                                                                                           |          |
|--------------------------------|---------|----------------------------------------------------------------------------------------------------------------------------------------------------------------------------|-------------------------------------------------------------------------------------------------------------------------------------------|----------|
| Tedamides A-D                  | 76-79   | <i>Tedania brasiliensis</i>                                                                                                                                                | Antiparasitic                                                                                                                             | 105      |
| Aculeine B                     | 245     | <i>Axinyssa aculeate</i>                                                                                                                                                   | Cytotoxicity, neuroactive                                                                                                                 | 106      |
| Protoaculeine B                | 246     | <i>Axinyssa aculeate</i>                                                                                                                                                   | -                                                                                                                                         | 107, 108 |
| <b>Insects</b>                 |         |                                                                                                                                                                            |                                                                                                                                           |          |
| Philanthotoxin-433             | 23      | <i>Philanthus triangulum</i>                                                                                                                                               | Non-competitive glutamate receptor inhibitor, toxin, visual function protection                                                           | 109, 110 |
| PA366                          | 24      | Theraphosidae<br>( <i>Acanthoscurria geniculata</i> ,<br><i>Chilobrachys penang</i> ,<br><i>Phlogius</i> sp., <i>Psalmopoeus irminia</i> )                                 | Anticancer, cytotoxicity                                                                                                                  | 111      |
| PA389                          | 25      | Theraphosidae<br>( <i>Ceratogyrus darlingi</i> ,<br><i>Harpactirella</i> sp.),<br>Hexathelidae ( <i>Atrax robustus</i> ),<br>Ctenizidae<br>( <i>Hebestatis theveneti</i> ) | Cytotoxicity                                                                                                                              | 111      |
| <b>Sea squirt</b>              |         |                                                                                                                                                                            |                                                                                                                                           |          |
| Didemnidines A and B           | 80, 81  | <i>Didemnum</i> sp.                                                                                                                                                        | Antiparasitic                                                                                                                             | 112      |
| <b>Shark &amp; sea lamprey</b> |         |                                                                                                                                                                            |                                                                                                                                           |          |
| Squalamine                     | 237     | <i>Squalus acanthias</i> ,<br><i>Petromyzon marinus</i>                                                                                                                    | Antibacterial (both G <sup>+</sup> and G <sup>-</sup> ), antifungal, antiprotozoan, antiviral, antitumor, antiangiogenic, and antiobesity | 113-116  |
| PASs 1-7                       | 238-244 | <i>Squalus acanthias</i>                                                                                                                                                   | Antibacterial (both G <sup>+</sup> and G <sup>-</sup> ), antifungal, antiprotozoan, antiviral, antitumor, antiangiogenic, and antiobesity | 116, 117 |

**Notes:**

1. The colors in the text represent different classes of polyamine-containing natural products.

Green: polyamine alkaloids;

Blue: polyamine siderophores;

Orange: NRP-(PK)-PA hybrids;

Blue grey: polyaminosterols;

Lavender: peptide-lcPA;

Red: NRP-PK-IcPFAN hybrids.

2. A dashed line “-” indicates that the compound is inactive or the activity of the compound has not been evaluated.



**Tab. S2** Proteins predicted to be involved in the attachment of the polyamine moiety to the scaffolds

| Protein           | Proposed function                                                                                                                            | Products                                      | No.                        | Ref. |
|-------------------|----------------------------------------------------------------------------------------------------------------------------------------------|-----------------------------------------------|----------------------------|------|
| GspSA             | ATP-grasp enzyme, ATP-dependent condensation glutathione and Spd                                                                             | Glutathionylsp<br>ermidine                    | <i>a</i>                   | 118  |
| HsvC              | Putative ATP-grasp enzyme, ATP-dependent condensation L-Val and guanyl-Spd                                                                   | Prephevamine<br>A                             | <b>276</b>                 | 26   |
| AsbA              | Type A NIS synthetase, ATP-dependent condensation citric acid and Spd                                                                        | Petrobactin                                   | <b>156</b>                 | 119  |
| AsbB              | Type C NIS synthetase, ATP-dependent condensation N <sup>8</sup> -citryl-Spd or N <sup>1</sup> -(3,4-DHB)-N <sup>8</sup> -citryl-Spd and Spd |                                               |                            | 120  |
| FbsG              | NRPS (C-T-C), condensation T-bound thioester intermediate and N <sup>1</sup> -acetyl-N <sup>1</sup> -hydroxy-Put                             | Fimsbactin A                                  | <b>157</b>                 | 35   |
| VibH              | NRPS (a stand-alone C domain), condensation ArCP-bound 2,3-DHB and Nspd                                                                      | DHB-Nspd                                      | <b>310</b>                 | 121  |
| BibC <sup>C</sup> | NIS synthetase, ATP-dependent dimerisation and macrocyclisation of HSC                                                                       | Bisucaberin                                   | <b>173</b>                 | 122  |
| DesD              | NIS synthetase, ATP-dependent condensation the adenylated HSC homodimer and HAC or trimerization of HSC                                      | Desferrioxamin<br>es B, E, and G <sub>1</sub> | <b>176</b><br><b>-178</b>  | 123  |
| FulD              | NIS synthetase, ATP-dependent trimerization of HSC                                                                                           | Desferrioxamin<br>e G <sub>1</sub>            | <b>178</b>                 | 51   |
| Achr_39<br>030    | Putative VibH-like protein or A-domain bearing protein, condensation the NRP scaffold and Put                                                | Crochelins B-D                                | <b>200</b><br><b>-202</b>  | 61   |
| GdnB              | NRPS module 13 (C <sub>13</sub> -A*-T-TE), condensation the peptidyl thioester intermediate and Put                                          | Glidonins F-L                                 | <b>218</b><br><b>-224</b>  | 66   |
| PamI              | BtrH-like protein, condensation the T-bound NRP-PK thioester intermediate and Spd                                                            | Prepaenilamici<br>n B2                        | <b>336</b>                 | 69   |
| Zmn19             | NRPS (a stand-alone C domain), condensation the ACP-bound NRP-PK thioester intermediate and zeamine II                                       | Prezeamine I,<br>prezeamine                   | <b>352</b><br><b>, 353</b> | 124  |
| FcIL              | A stand-alone C domain-like protein, condensation the ACP-bound NRP-PK thioester intermediate and lcPFAN-type polyamine <b>11</b>            | Fabclavine IIa                                | <b>251</b>                 | 79   |
| FlvF              | Terpene cyclase-like enzyme, condensation the carbocationic tetracyclic sesquiterpene and dimethylcadaverine                                 | Flavunoidine                                  | <b>60</b>                  | 125  |

Notes:

1. The colors of the text represent different mechanisms involved in the attachment of the polyamine moiety to the scaffolds.

Red: Proposed mechanism (i), ATP-grasp enzyme (Fig. 30A);

Blue: Proposed mechanism (ii), acyl-adenylate forming enzyme (Fig. 30B);

Green: Proposed mechanism (iii), NRPS with a C or C-like domain (Fig. 30C);

Violet: Proposed mechanism (iv), terpene cyclase-like enzyme (Fig. 30D).

2. <sup>a</sup> The molecule is not shown in this review.

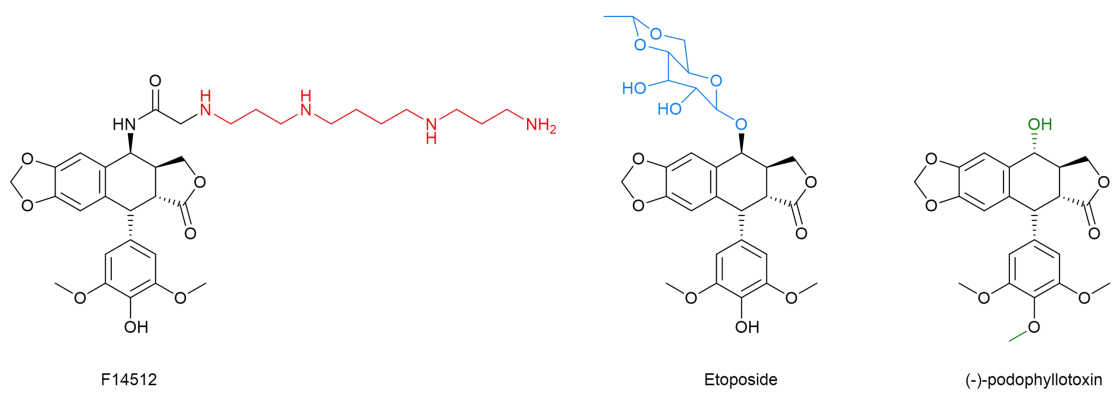

**Fig. S1** Structures of two semi-synthetic compounds F14512 and etoposide and their natural precursor (-)-podophyllotoxin

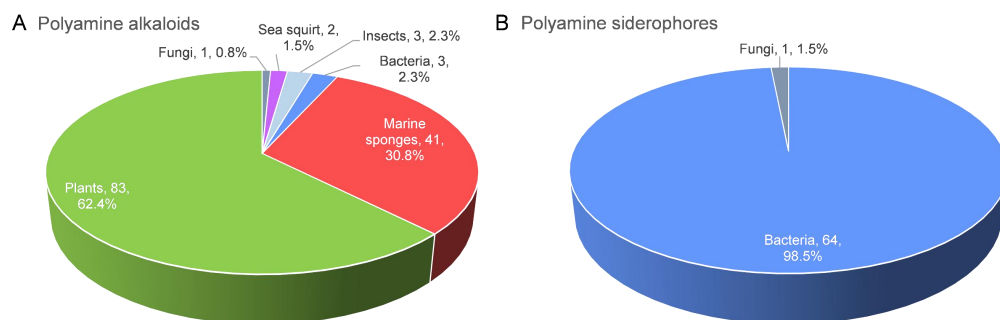

**Fig. S2** Source composition of polyamine alkaloids (**A**) and polyamine siderophores (**B**)

In the last 20 years, polyamine alkaloids were discovered mainly from plants (83, 62.4%) and marine sponges (41, 30.8%), but also from other organisms, such as bacteria (3, 2.3%), insects (3, 2.3%), sea squirt (2, 1.5%), and fungi (1, 0.8%). Interestingly, polyamine siderophores were isolated mainly from bacteria (64, 98.5%) and also identified in fungi (1, 1.5%).

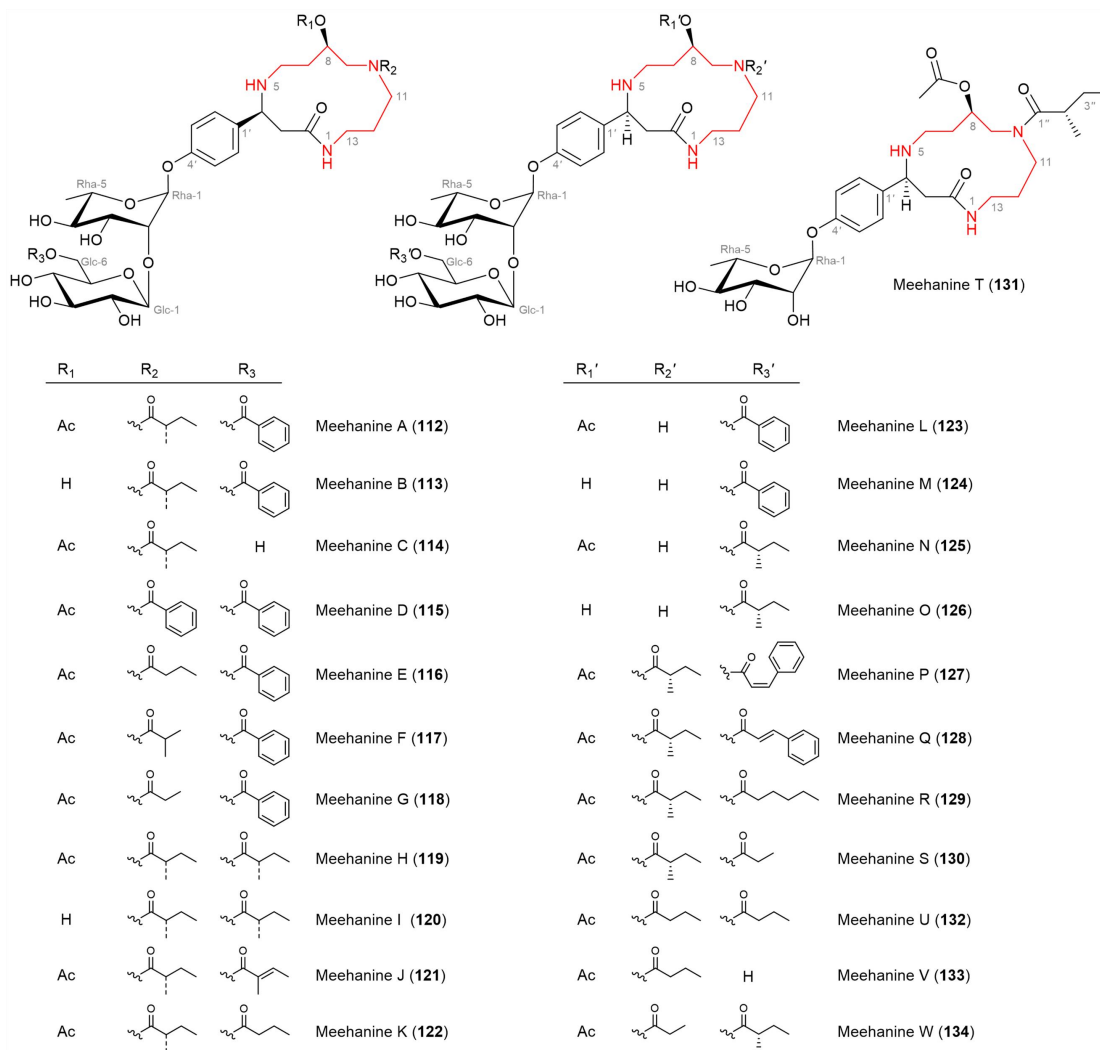

**Fig. S3 Structures of meehanines A-W (112-134)**

## References

1. Z. Long, Y. Zhang, Z. Guo, L. Wang, X. Xue, X. Zhang, S. Wang, Z. Wang, O. Civelli and X. Liang, *Planta Med.*, 2014, **80**, 1124-1130.
2. J. Perrin, N. Kulagina, M. Unlubayir, T. Munsch, I. Carqueijeiro, T. D. d. Bernonville, J.-O. D. Craene, M. Clastre, B. St-Pierre, N. Giglioli-Guivarc'h, D. Gagneul, A. Lanoue, V. Courdavault and S. Besseau, *ACS Synth. Biol.*, 2021, **10**, 286-296.
3. D. Walters, B. Meurer-Grimes and I. Rovira, *FEMS Microbiol. Lett.*, 2001, **201**, 255-258.
4. C.-M. Ma, N. Nakamura and M. Hattori, *Chem. Pharm. Bull.*, 2001, **49**, 915-917.
5. G. Zhao, Y. Gai, W.-J. Chu, G.-W. Qin and L.-H. Guo, *Eur. Neuropsychopharmacol.*, 2009, **19**, 749-758.
6. S. Ohta, T. Fujimaki, M. M. Uy, M. Yanai, A. Yukiyoishi and T. Hirata, *Nat. Prod. Res.*, 2007, **21**, 726-732.
7. D. Stærk, M. Witt, H. A. Oketch-Rabah and J. W. Jaroszewski, *Org. Lett.*, 2003, **5**, 2793-2796.
8. B. Rasmussen, A.-J. Nkurunziza, M. Witt, H. A. Oketch-Rabah, J. W. Jaroszewski and D. Stærk, *J. Nat. Prod.*, 2006, **69**, 1300-1304.
9. E. M. Addo, Y. Ren, G. D. Anaya-Eugenio, T. N. Ninh, H. L. Rakotondraibe, E. J. C. d. Blanco, D. D. Soejarto and A. D. Kinghorn, *Phytochem. Lett.*, 2021, **43**, 154-162.
10. Z.-Q. Zhou, H.-X. Fan, R.-R. He, J. Xiao, B. Tsoi, K.-H. Lan, H. Kurihara, K.-F. So, X.-S. Yao and H. Gao, *J. Agric. Food Chem.*, 2016, **64**, 2223-2237.
11. D. Chen, S. Guo, J. Zhou, Y. Zhu, F. Zhang, F. Zeng, R. Duan, M. Xu and J.-a. Duan, *Biochem. Syst. Ecol.*, 2021, **97**, 104292.
12. D. Qian, J. Chen, C. Lai, L. Kang, S. Xiao, J. Song, J. Xie and L. Huang, *Fitoterapia*, 2020, **143**, 104543.
13. X. P. Fu, T. Wu, M. Abdurahim, Z. Su, X. L. Hou, H. A. Aisa and H. Wu, *Phytochem. Lett.*, 2008, **1**, 59-62.
14. V. U. Ahmad, A.-u.-R. Amber, S. Arif, M. H. M. Chen and J. Clardy, *Phytochemistry*, 1985, **24**, 2709-2711.
15. R. K. Upadhyay, *Int. J. Green Pharm.*, 2011, **5**.
16. S.-Q. Wang, D.-M. Ren, F. Xiang, X.-N. Wang, C.-J. Zhu, H.-Q. Yuan, L.-M. Sun, B.-B. Lv, X.-J. Sun and H.-X. Lou, *J. Nat. Prod.*, 2009, **72**, 1006-1010.
17. K. Aihaiti, J. Li, S. Yaermainaiti, Q. Yin and H. A. Aisa, *Nat. Prod. Res.*, 2022, 1-7.
18. T. Murata, T. Miyase, T. Warashina and F. Yoshizaki, *J. Nat. Prod.*, 2009, **72**, 1049-1056.
19. T. Murata, T. Miyase and F. Yoshizaki, *J. Nat. Prod.*, 2009, **72**, 1937-1943.
20. Z.-X. Xu, B. Li, Y. Tian, M. Li, J.-X. Dong and G.-J. Zhang, *Org. Biomol. Chem.*, 2021, **19**, 9844-9848.
21. C. J. Hamilton, A. Saravanamuthu, C. Poupat, A. H. Fairlamb and I. M. Eggleston, *Bioorg.*

- Med. Chem.*, 2005, **14**, 2266-2278.
22. A.-C. L. Lamer, N. Ibrahim, F. Manjary, S. Mallet-Ladeira, C. Girardi, A. Valentin, N. Fabre and C. Moulis, *Molecules*, 2013, **18**, 3962-3971.
  23. T. Murata, T. Miyase and F. Yoshizaki, *Chem. Pharm. Bull.*, 2010, **58**, 696-702.
  24. J. Liu, Q. Wu, J. Shu, R. Zhang and L. Liu, *Chem. Nat. Compd.*, 2020, **56**, 496-499.
  25. G. d. Silva, A. Martinho, R. G. Soengas, A. P. Duarte, R. Serrano, E. Gomes and O. Silva, *Fitoterapia*, 2015, **106**, 7-11.
  26. E. M. O'Neill, T. S. Mucyn, J. B. Patteson, O. M. Finkel, E.-H. Chung, J. A. Baccile, E. Massolo, F. C. Schroeder, J. L. Dangl and B. Li, *Proc. Natl. Acad. Sci. USA*, 2018, **115**, E9514-E9522.
  27. T. Kawahara, M. Izumikawa, M. Otoguro, H. Yamamura, M. Hayakawa, M. Takagi and K. Shin-ya, *J. Nat. Prod.*, 2012, **75**, 107-110.
  28. Z. L. Reitz and A. Butler, *Chem. Commun.*, 2020, **56**, 12222-12225.
  29. A. L. Miller, S. Li, C. D. Eichhorn, Y. Zheng and L. Du, *J. Agric. Food Chem.*, 2023, **71**, 7418-7426.
  30. P. M. Eze, V. Simons, T. Seidemann, L. Wang, A.-L. Kiffe-Delf, M. Frank, L. v. Geelen, C. C. Abba, C. O. Esimone, F. B. Okoye and R. Kalscheuer, *Trop. J. Pharm. Res.*, 2021, **20**, 2551-2558.
  31. Y. Schneider, M. Jenssen, J. Isaksson, K. Ø. Hansen, J. H. Andersen and E. H. Hansen, *Microorganisms*, 2020, **8**, 1042.
  32. A. T. Koppisch, C. C. Browder, A. L. Moe, J. T. Shelley, B. A. Kinkel, L. E. Hersman, S. Iyer and C. E. Ruggiero, *Biometals*, 2005, **18**, 577-585.
  33. K. Barbeau, G. Zhang, D. H. Live and A. Butler, *J. Am. Chem. Soc.*, 2002, **124**, 378-379.
  34. L. E. Manck, J. Park, B. J. Tully, A. M. Poire, R. M. Bundy, C. L. Dupont and K. A. Barbeau, *ISME J.*, 2022, **16**, 358-369.
  35. A. Proschak, P. Lubuta, P. Grün, F. Löhr, G. Wilharm, V. D. Berardinis and H. B. Bode, *Chembiochem*, 2013, **14**, 633-638.
  36. T. A. Ciche, M. Blackburn, J. R. Carney and J. C. Ensign, *Appl. Environ. Microbiol.*, 2003, **69**, 4706-4713.
  37. G. L. Griffiths, S. P. Sigel, S. M. Payne and J. B. Neilands, *J. Biol. Chem.*, 1984, **259**, 383-385.
  38. N. Okujo, M. Saito, S. Yamamoto, T. Yoshida, S. Miyoshi and S. Shinoda, *Biometals*, 1994, **7**, 109-116.
  39. S. Yamamoto, N. Okujo, Y. Fujita, M. Saito, T. Yoshida and S. Shinoda, *J. Biochem.*, 1993, **113**, 538-544.
  40. A. Nielsen, M. Mansson, M. Wietz, A. N. Varming, R. K. Phipps, T. O. Larsen, L. Gram and H. Ingmer, *Mar. Drugs*, 2012, **10**, 2584-2595.
  41. S. A. Ong, T. Peterson and J. B. Neilands, *J. Biol. Chem.*, 1979, **254**, 1860-1865.
  42. T. Peterson and J. B. Neilands, *Tetrahedron Lett.*, 1979, **20**, 4805-4808.
  43. A. R. Sharma, T. Zhou, E. Harunari, N. Oku, A. Trianto and Y. Igarashi, *J. Antibiot.*, 2019, **72**,

634-639.

44. N. Kadi, S. Arbache, L. Song, D. Oves-Costales and G. L. Challis, *J. Am. Chem. Soc.*, 2008, **130**, 10458-10459.
45. T. Böttcher and J. Clardy, *Angew. Chem. Int. Ed.*, 2014, **53**, 3510-3513.
46. A. Takahashi, H. Nakamura, T. Kameyama, S. Kurasawa, H. Naganawa, Y. Okami, T. Takeuchi, H. Umezawa and Y. Iitaka, *J. Antibiot.*, 1987, **40**, 1671-1676.
47. G. Winkelmann, D. G. Schmid, G. Nicholson, G. Jung and D. J. Colquhoun, *BioMetals*, 2002, **15**, 153-160.
48. N. Kuncharoen, N. Bunbamrung, C. Intaraudom, W. Choowong, C. Thawai, S. Tanasupawat and P. Pittayakhajonwut, *Phytochemistry*, 2023, **207**, 113568.
49. F. Barona-Gómez, U. Wong, A. E. Giannakopoulos, P. J. Derrick and G. L. Challis, *J. Am. Chem. Soc.*, 2004, **126**, 16282-16283.
50. T. H. M. Smits and B. Duffy, *Arch. Microbiol.*, 2011, **193**, 693-699.
51. Z.-J. Wang, H. Zhou, G. Zhong, L. Huo, Y.-J. Tang, Y. Zhang and X. Bian, *Org. Lett.*, 2020, **22**, 939-943.
52. T. Funahashi, T. Tanabe, J. Maki, K. Miyamoto, H. Tsujibo and S. Yamamoto, *Microbiology*, 2013, **159**, 678-690.
53. M. Persmark, P. Pittman, J. S. Buyer, B. Schwyn, P. R. G. Jr. and J. B. Neilands, *J. Am. Chem. Soc.*, 1993, **115**, 3950-3956.
54. D. Lynch, J. O'Brien, T. Welch, P. Clarke, P. r. ÓCúiv, J. H. Crosa and M. O'Connell, *J. Bacteriol.*, 2001, **183**, 2576-2585.
55. Y. Ito and A. Butler, *Limnol. Oceanogr.*, 2005, **50**, 1918-1923.
56. K. B. Mullis, J. R. Pollack and J. B. Neilands, *Biochemistry*, 1971, **10**, 4894-4898.
57. E. P. Storey, R. Boghozian, J. L. Little, D. W. Lowman and R. Chakraborty, *BioMetals*, 2006, **19**, 637-649.
58. Y. Takehana, M. Umekita, M. Hatano, C. Kato, R. Sawa and M. Igarashi, *J. Antibiot.*, 2017, **70**, 611-615.
59. J. Franke, K. Ishida, M. Ishida-Ito and C. Hertweck, *Angew. Chem. Int. Ed.*, 2013, **52**, 8271-8275.
60. C. D. Hardy and A. Butler, *J. Biol. Inorg. Chem.*, 2018, **23**, 957-967.
61. O. Baars, X. Zhang, M. I. Gibson, A. T. Stone, F. M. M. Morel and M. R. Seyedsayamdost, *Angew. Chem. Int. Ed.*, 2018, **57**, 545-550.
62. H. Stephan, S. Freund, W. Beck, G. Jung, J.-M. Meyer and G. Winkelmann, *BioMetals*, 1993, **6**, 93-100.
63. K. Agnoli, C. A. Lowe, K. L. Farmer, S. I. Husnain and M. S. Thomas, *J. Bacteriol.*, 2006, **188**, 3631-3644.
64. M. J. Vargas-Straube, B. Cámara, M. Tello, F. Montero-Silva, F. Cárdenas and M. Seeger, *PLoS One*, 2016, **11**, e0151273.



65. X. Wang, H. Zhou, X. Ren, H. Chen, L. Zhong, X. Bai and X. Bian, *Eng. Microbiol.*, 2023, **3**, 100106.
66. H. Chen, L. Zhong, H. Zhou, X. Bai, T. Sun, X. Wang, Y. Zhao, X. Ji, Q. Tu, Y. Zhang and X. Bian, *Nat. Commun.*, 2023, **(in revision)**.
67. E. L. Westman, M. Yan, N. Waglechner, K. Koteva and G. D. Wright, *Chem. Biol.*, 2013, **20**, 983-990.
68. Q. Liu, L. Zhang, Y. Wang, C. Zhang, T. Liu, C. Duan, X. Bian, Z. Guo, Q. Long, Y. Tang, J. Du, A. Liu, L. Dai, D. Li and W. Chen, *Microb. Biotechnol.*, 2022, **15**, 577-589.
69. S. Müller, E. Garcia-Gonzalez, A. Mainz, G. Hertlein, N. C. Heid, E. Mösker, H. v. d. Elst, H. S. Overkleeft, E. Genersch and R. D. Süssmuth, *Angew. Chem. Int. Ed.*, 2014, **53**, 10821-10825.
70. J. I. Shoji, R. Sakazaki, Y. Wakisaka, K. Koizumi, M. Mayama and S. Matsuura, *J. Antibiot.*, 1975, **28**, 122-125.
71. Y. He, Y. Lan, Y. Liu, H. Yu, Z. Han, X. Li and L. Zhang, *Molecules*, 2016, **21**.
72. Y. C. Deng, Y. S. Zhen, S. Zheng and Y. C. Xue, *World J. Gastroentero.*, 2001, **7**, 93-97.
73. H.-z. Xu, L. Yu, X.-r. Zhang and S.-y. Wang, *J. Chin. Antibiot.*, 2003, **28**, 465-467.
74. J. Wu, H.-B. Zhang, J.-L. Xu, R. J. Cox, T. J. Simpson and L.-H. Zhang, *Chem. Commun.*, 2010, **46**, 333-335.
75. L. Liao, J. Zhou, H. Wang, F. He, S. Liu, Z. Jiang, S. Chen and L.-H. Zhang, *Sci. Rep.*, 2015, **5**, 15719.
76. J. E. E. U. Hellberg, M. A. Matilla and G. P. C. Salmond, *Front. Microbiol.*, 2015, **6**, 137.
77. S. W. Fuchs, F. Grundmann, M. Kurz, M. Kaiser and H. B. Bode, *ChemBioChem*, 2014, **15**, 512-516.
78. D. Abebew, F. S. Sayedain, E. Bode and H. B. Bode, *J. Agric. Food Chem.*, 2022, **70**, 498-506.
79. S. L. Wenski, D. Kolbert, G. L. C. Grammbitter and H. B. Bode, *J. Ind. Microbiol. Biotechnol.*, 2019, **46**, 565-572.
80. D. A. Yee, T. B. Kakule, W. Cheng, M. Chen, C. T. Y. Chong, Y. Hai, L. F. Hang, Y.-S. Hung, N. Liu, M. Ohashi, I. C. Okorafor, Y. Song, M. Tang, Z. Zhang and Y. Tang, *J. Am. Chem. Soc.*, 2020, **142**, 710-714.
81. W. Steglich, B. Steffan, K. Stroech and M. Wolf, *Zeitschrift für Naturforschung C*, 1984, **39**, 10-12.
82. I.-K. Lee, D.-W. Ki, S.-E. Kim, J.-H. Yeom, Y.-S. Kim and B.-S. Yun, *J. Korean Soc. Appl. Biol. Chem.*, 2011, **54**, 312-315.
83. R. J. Capon, M. Stewart, R. Ratnayake, E. Lacey and J. H. Gill, *J. Nat. Prod.*, 2007, **70**, 1746-1752.
84. K. M. Tabakmakher, T. N. Makarieva, V. A. Denisenko, A. G. Guzii, P. S. Dmitrenok, A. S. Kuzmich and V. A. Stonik, *Nat. Prod. Commun.*, 2015, **10**, 913-916.
85. K. M. Tabakmakher, T. N. Makarieva, V. A. Denisenko, R. S. Popov, A. S. Kuzmich, L. K.

- Shubina, H.-S. Lee, Y.-J. Lee and S. N. Fedorov, *Nat. Prod. Commun.*, 2017, **12**, 1029-1032.
86. T. N. Makarieva, K. M. Tabakmaher, A. G. Guzii, V. A. Denisenko, P. S. Dmitrenok, A. S. Kuzmich, H.-S. Lee and V. A. Stonik, *Tetrahedron Lett.*, 2012, **53**, 4228-4231.
87. K. M. Tabakmakher, V. A. Denisenko, A. G. Guzii, P. S. Dmitrenok, S. A. Dyshlovoy, H.-S. Lee and T. N. Makarieva, *Nat. Prod. Commun.*, 2013, **8**, 1399-1402.
88. Y. Kashman, S. Hirsh, O. J. McConnell, I. Ohtani, T. Kusumi and H. Kakisawa, *J. Am. Chem. Soc.*, 1989, **111**, 8925-8926.
89. K. M. Tabakmakher, T. N. Makarieva, L. K. Shubina, V. A. Denisenko, R. S. Popov, A. S. Kuzmich, H.-S. Lee, Y.-J. Lee and V. A. Stonik, *Nat. Prod. Commun.*, 2016, **11**, 1817-1820.
90. Y. Kashman, G. Koren-Goldshlager, M. D. GarciaGravalos and M. Schleyer, *Tetrahedron Lett.*, 1999, **40**, 997-1000.
91. H. Sorek, A. Rudi, M. Aknin, E. M. Gaydou and Y. Kashman, *J. Nat. Prod.*, 2010, **73**, 456-458.
92. G. Koren-Goldshlager, Y. Kashman and M. Schleyer, *J. Nat. Prod.*, 1998, **61**, 282-284.
93. D. Zhang, Y. Li, X. Li, X. Han, Z. Wang, W. Zhang, B. Dou, Z. Lu, P. Li and G. Li, *J. Nat. Prod.*, 2022, **85**, 1626-1633.
94. Z. Liang, F. J. Sulzmaier, W. Y. Yoshida, M. Kelly, J. W. Ramos and P. G. Williams, *J. Nat. Prod.*, 2015, **78**, 543-547.
95. B. J. Baker, P. J. Scheuer and J. N. Shoolery, *J. Am. Chem. Soc.*, 1988, **110**, 965-966.
96. E. Fahy, T. F. Molinski, M. K. Harper, B. W. Sullivan, D. J. Faulkner, L. Parkanyi and J. Clardy, *Tetrahedron Lett.*, 1988, **29**, 3427-3428.
97. H. Yamazaki, D. S. Wewengkang, S.-i. Kanno, M. Ishikawa, H. Rotinsulu, R. E. P. Mangindaan and M. Namikoshi, *Nat. Prod. Res.*, 2013, **27**, 1012-1015.
98. D. B. Abdjul, H. Yamazaki, S.-i. Kanno, O. Takahashi, R. Kirikoshi, K. Ukai and M. Namikoshi, *J. Nat. Prod.*, 2016, **79**, 1149-1154.
99. M. Xu, R. A. Davis, Y. Feng, M. L. Sykes, T. Shelper, V. M. Avery, D. Camp and R. J. Quinn, *J. Nat. Prod.*, 2012, **75**, 1001-1005.
100. N. Fusetani, Y. Masuda, Y. Nakao, S. Matsunaga and R. W. M. v. Soest, *Tetrahedron*, 2001, **57**, 7507-7511.
101. M. S. Buchanan, A. R. Carroll, G. A. Fechner, A. Boyle, M. M. Simpson, R. Addepalli, V. M. Avery, J. N. A. Hooper, N. Su, H. Chen and R. J. Quinn, *Bioorg. Med. Chem. Lett.*, 2007, **17**, 6860-6863.
102. S. Yin, R. A. Davis, T. Shelper, M. L. Sykes, V. M. Avery, M. Eloffsson, C. Sundinc and R. J. Quinn, *Org. Biomol. Chem.*, 2011, **9**, 6755-6760.
103. S. Tsukamoto, H. Kato, H. Hirota and N. Fusetani, *Tetrahedron Lett.*, 1996, **37**, 1439-1440.
104. J. A. Ponasik, D. J. Kassab and B. Ganem, *Tetrahedron Lett.*, 1996, **37**, 6041-6044.
105. L. L. L. Parra, A. F. Bertonha, I. R. M. Severo, A. C. C. Aguiar, G. E. d. Souza, G. Oliva, R. V. C. Guido, N. Grazzia, T. R. Costa, D. C. Miguel, F. R. Gadelha, A. G. Ferreira, E. Hajdu, D. Romo and R. G. S. Berlinck, *J. Nat. Prod.*, 2018, **81**, 188-202.

106. S. Matsunaga, M. Jimbo, M. B. Gill, L. L. L.-V. Wyhe, M. Murata, K. i. Nonomura, G. T. Swanson and R. Sakai, *ChemBioChem*, 2011, **12**, 2191-2200.
107. S. Matsunaga, R. Kishi, K. Otsuka, M. J. Fujita, M. Oikawa and R. Sakai, *Org. Lett.*, 2014, **16**, 3090-3093.
108. R. Irie, K. Miyako, S. Matsunaga, R. Sakai and M. Oikawa, *J. Nat. Prod.*, 2021, **84**, 1203-1209.
109. K. Nakanishi, R. Goodnow, K. Konno, M. Niwa, R. Bukownik, T. A. Kallimopoulos, P. Usherwood, A. T. Eldefrawi and M. E. Eldefrawi, *Pure & Appl. Chem.*, 1990, **62**, 1223-1230.
110. M. F. Fazel, I. F. Abu, M. H. N. Mohamad, R. Agarwal, I. Iezhitsa, N. S. Bakar, N. Juliana, I. R. Mellor and H. Franzyk, *PLoS One*, 2020, **15**, e0236450.
111. D. Wilson, G. M. Boyle, L. McIntyre, M. J. Nolan, P. G. Parsons, J. J. Smith, L. Tribolet, A. Loukas, M. J. Liddell, L. D. Rash and N. L. Daly, *Toxins*, 2017, **9**, 346.
112. R. Finlayson, A. N. Pearce, M. J. Page, M. Kaiser, M.-L. Bourguet-Kondracki, J. L. Harper, V. L. Webb and B. R. Copp, *J. Nat. Prod.*, 2011, **74**, 888-892.
113. K. S. Moore, S. Wehrli, H. Roder, M. Rogers, J. N. F. Jr, D. McCrimmon and M. Zasloff, *Proc. Natl. Acad. Sci. USA*, 1993, **90**, 1354-1358.
114. A. K. S. Jr., J. I. Williams, B. M. Tyler, D. S. Epstein, E. P. Sipos, J. D. Davis, M. P. McLane, S. Pitchford, K. Cheshire, F. H. Gannon, W. A. Kinney, T. L. Chao, M. Donowitz, J. L. Latterra, M. Zasloff and H. Brem, *Cancer Res.*, 1998, **58**, 2784-2792.
115. M. Zasloff, A. P. Adams, B. Beckerman, A. Campbell, Z. Han, E. Luijten, I. Meza, J. Julander, A. Mishra, W. Qu, J. M. Taylor, S. C. Weaver and G. C. L. Wong, *Proc. Natl. Acad. Sci. USA*, 2011, **108**, 15978-15983.
116. O. Kazakova, G. Giniyatullina, D. Babkov and Z. Wimmer, *Int. J. Mol. Sci.*, 2022, **23**, 1075.
117. M. N. Rao, A. E. Shinnar, L. A. Noecker, T. L. Chao, B. Feibush, B. Snyder, I. Sharkansky, A. Sarkahian, X. Zhang, S. R. Jones, W. A. Kinney and M. Zasloff, *J. Nat. Prod.*, 2000, **63**, 631-635.
118. J. L. Pederick, J. Klose, B. Jovcevski, T. L. Pukala and J. B. Bruning, *Biochemistry*, 2023, **62**, 899-911.
119. D. Oves-Costales, N. Kadi, M. J. Fogg, L. Song, K. S. Wilson and G. L. Challis, *J. Am. Chem. Soc.*, 2007, **129**, 8416-8417.
120. T. D. Nusca, Y. Kim, N. Maltseva, J. Y. Lee, W. Eschenfeldt, L. Stols, M. M. Schofield, J. B. Scaglione, S. D. Dixon, D. Oves-Costales, G. L. Challis, P. C. Hanna, B. F. Pflieger, A. Joachimiak and D. H. Sherman, *J. Biol. Chem.*, 2012, **287**, 16058-16072.
121. T. A. Keating, C. G. Marshall and C. T. Walsh, *Biochemistry*, 2000, **39**, 15513-15521.
122. N. Kadi, L. Song and G. L. Challis, *Chem. Commun.*, 2008, 5119-5121.
123. N. Kadi, D. Oves-Costales, F. Barona-Gomez and G. L. Challis, *Nat. Chem. Biol.*, 2007, **3**, 652-656.
124. J. Masschelein, C. Clauwers, U. R. Awodi, K. Stalmans, W. Vermaelen, E. Lescrinier, A.

- Aertsen, C. Michiels, G. L. Challis and R. Lavigne, *Chem. Sci.*, 2015, **6**, 923-929.
125. M. A. Tararina, D. A. Yee, Y. Tang and D. W. Christianson, *Biochemistry*, 2022, **61**, 2014-2024.
